# Supplementary material for: β‐Thalassemia pathogenic variants in a cohort of children from the East African coast
Source: PubMed Central journal article supplement (PMC7336762; doi:10.1002/mgg3.1294), 2020-05-11

**Table S1.** Diagnostic accuracy of HbA<sub>2</sub> in predicting β-thalassemia within the entire population, including those with HbAS and HbSS.

| <b>β-thalassemia</b>    | <b>HbA<sub>2</sub> &lt;3.5%</b> | <b>HbA<sub>2</sub> ≥3.5%</b> | <b>HbA<sub>2</sub> ≥4%</b> |
|-------------------------|---------------------------------|------------------------------|----------------------------|
| Present <sup>‡</sup>    | 0                               | 95                           | 86                         |
| Absent <sup>‡</sup>     | 13277                           | 2205                         | 917                        |
| Sensitivity (%; 95% CI) | N/A                             | 100.0 (95.2-100.0)           | 90.5 (82.3-95.3)           |
| Specificity (%; 95% CI) | N/A                             | 85.8 (85.2-86.3)             | 94.0 (93.7-94.4)           |
| PPV (%; 95% CI)         | N/A                             | 4.1 (3.4-5.0)                | 8.6 (7.0-10.5)             |
| NPV (%; 95% CI)         | N/A                             | 100 (99.9-100.0)             | 99.9 (99.9-100.0)          |

N/A Not applicable – no alleles detected within this group. <sup>‡</sup>The estimated numbers of β-thalassemia carriers within each sub-group were calculated from the fractions within each Hb type and HbA<sub>2</sub> category, multiplied by the number of participants within the equivalent sub-group within the whole population.

**Figure S1.** Haplotype block and linkage disequilibrium (LD) of 3 tag SNPs rs12788013, rs1609812 and rs713040. Pairwise correlation values ( $D'$ ) are shown as numbers inside the squares. The red squares represent high level of LD between two SNPs.

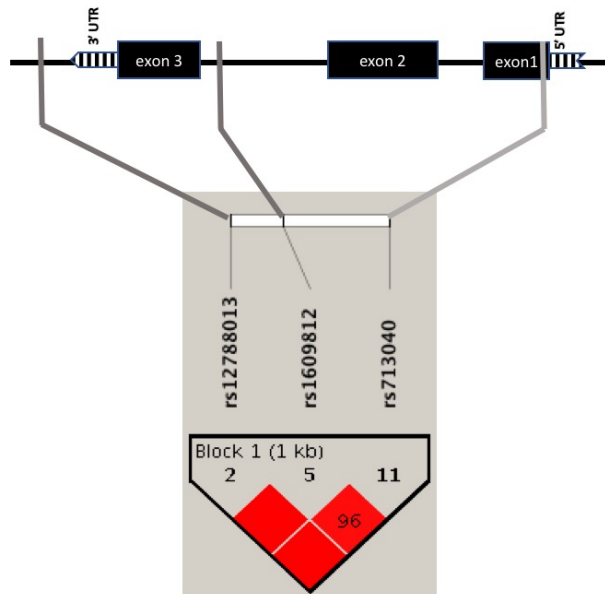

**Figure S2.** HbA<sub>2</sub> levels classified by HPLC haemoglobin phenotype and presence or absence of  $\beta$ -thalassemia mutations.

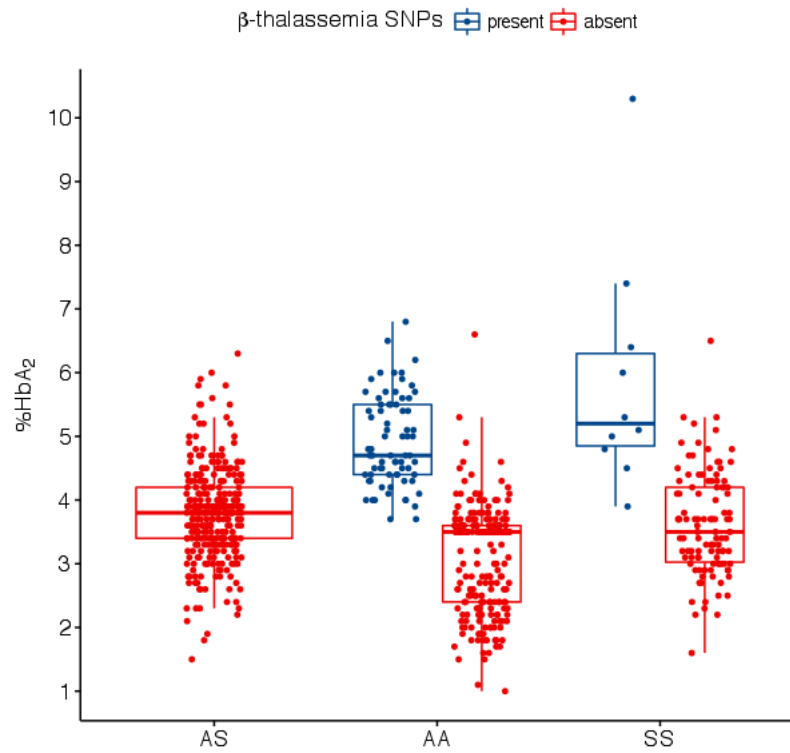

**Figure S3.** Distribution of  $\beta$ -thalassemia mutations using ethnolinguistic background.

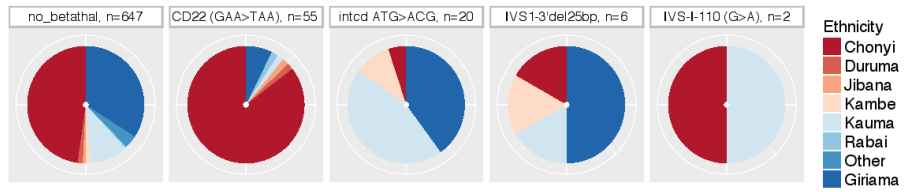

Supplement: MGG3-8-e1294-s001.pdf [file MGG3-8-e1294-s001.pdf]
